# Supplementary material for: Phylogeography of Paramuricea: The Role of Depth and Water Mass in the Evolution and Distribution of Deep-Sea Corals
Source: Frontiers journal article supplement (doi:10.3389/fmars.2022.849402), 2022-04-06
Supplement: Data_Sheet_1.zip [file Supplemental File 2.docx]

A

B

C

Supplemental Figure 1. Phylogenetic reconstruction of barcoding dataset using IQTree. Statistical support is shown on nodes with SH-aLRT tests (left) and ultrafast bootstrap (UFBoot) (right) A) MutS tree, B) 28S rDNA tree, C) concatenated MutS-28S tree.

Supplemental Figure 2. deltaK values from Structure Harvester

A

B


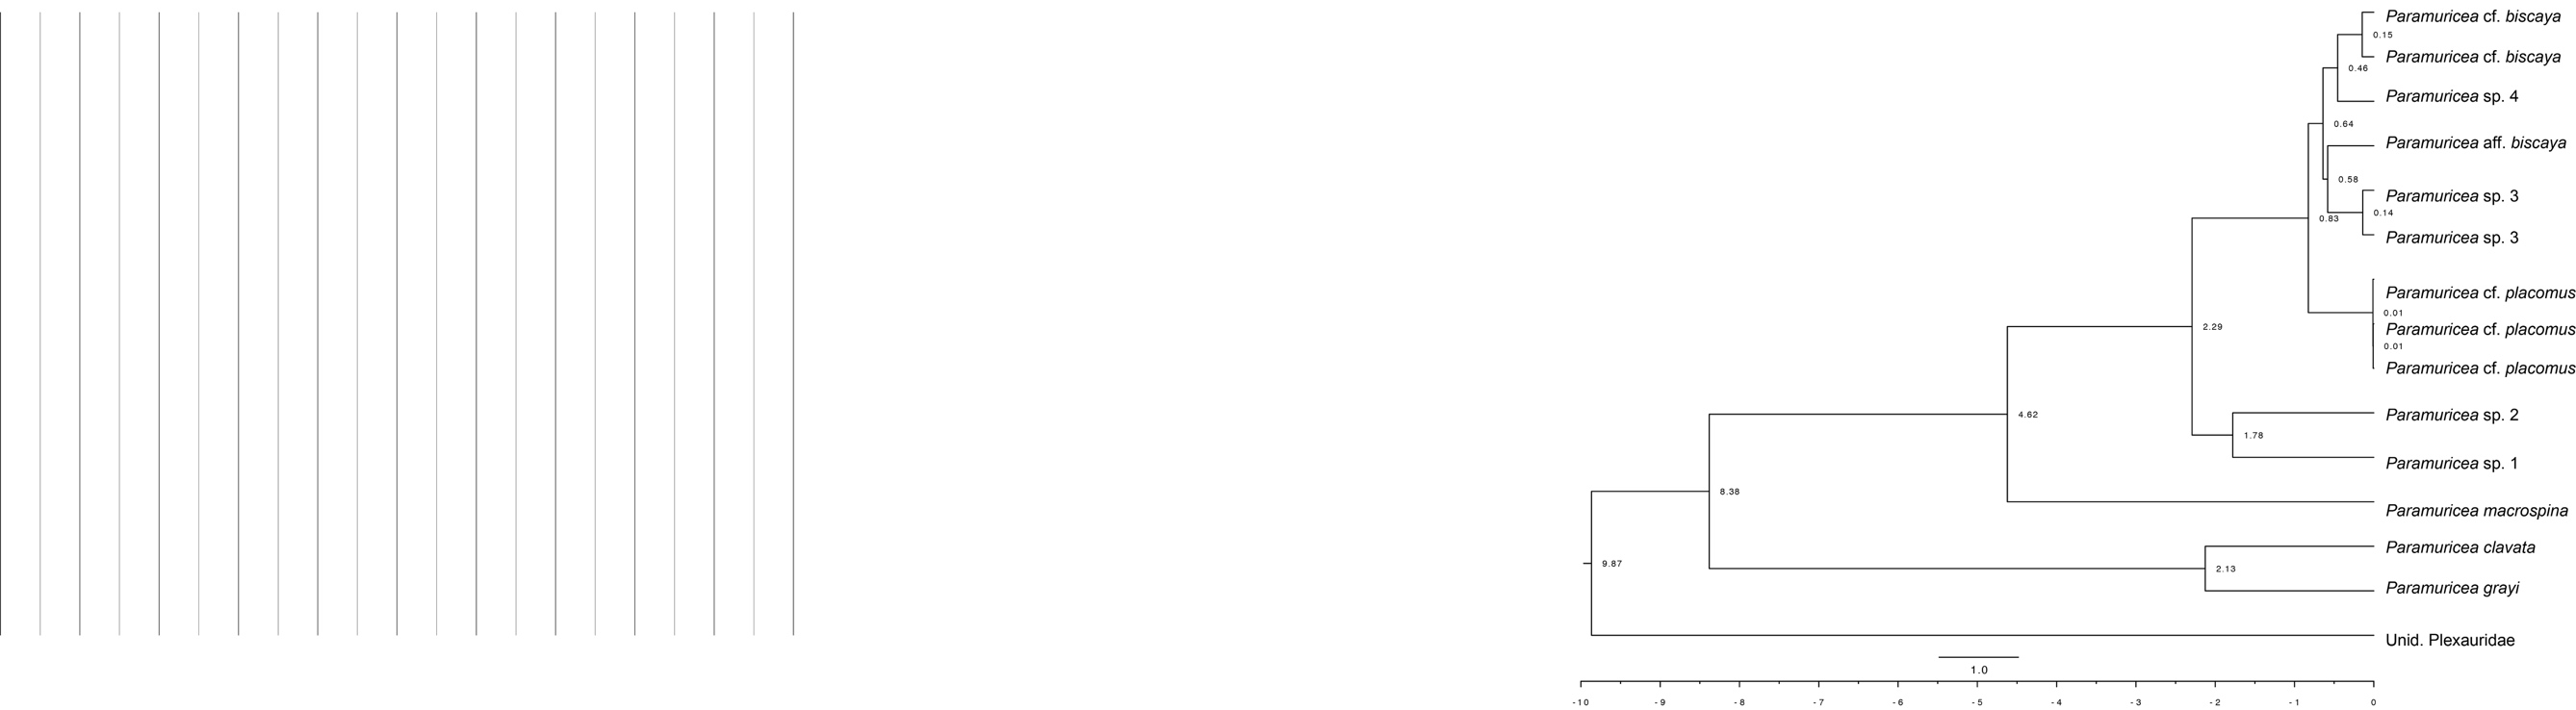


C


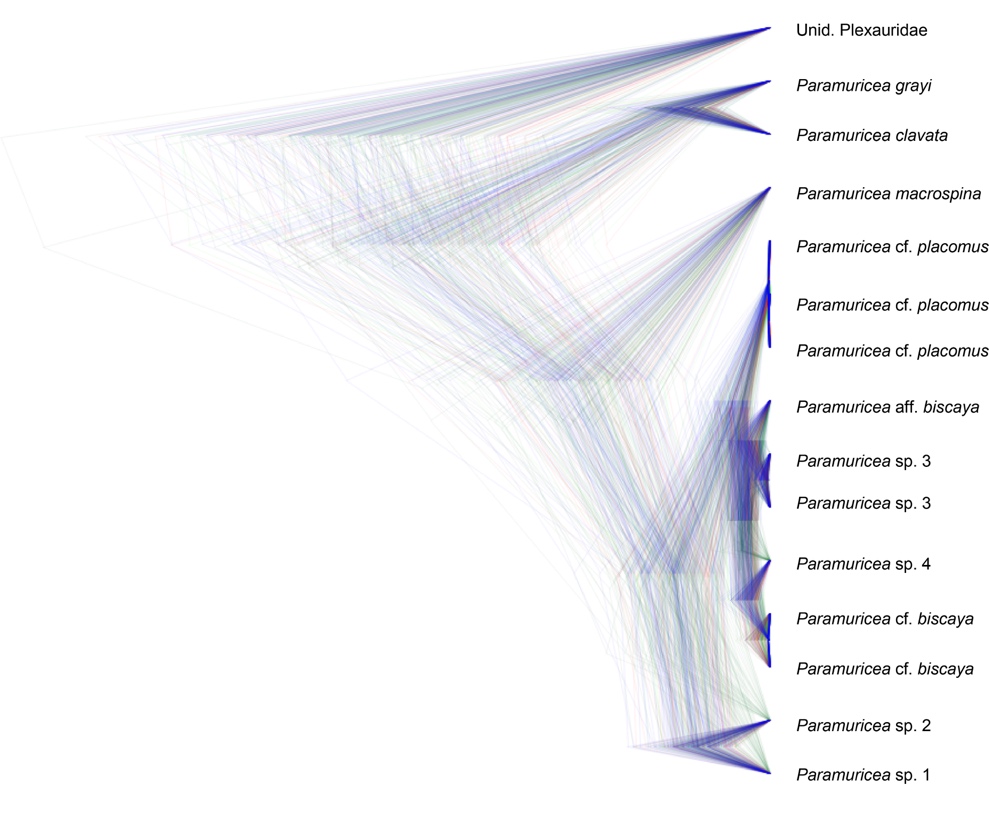


Supplemental Figure 3. Cloudogram of trees from (A) undated SNAPP analysis and (B-C) dated SNAPP analysis on a second subset of samples. Maximum clade credibility tree with posterior probabilities on the right.

Supplemental Figure 4. Depth range evolution using the dispersal-extirpation-cladogenesis model in RevBayes. Nodes are annotated with ancestral states (pie charts) before and after cladogenic events. Tips are annotated with contemporary distributions. Depth Range: Deep=>200 m, Meso=0-200 m, DeepMeso0->200 m.

Supplemental Figure 5. Water mass range evolution using the dispersal-extirpation-cladogenesis model in RevBayes. Nodes are annotated with ancestral states (pie charts) before and after cladogenic events. Tips are annotated with contemporary distributions. Water Mass Range: MOW=Mediterranean Overflow Water, NACW=North Atlantic Central Water, AAIW=Antarctic Intermediate Water, LSW=Labrador Sea Water, NADW=North Atlantic Deep Water.
