# Supplementary material for: Phylogeography of Paramuricea: The Role of Depth and Water Mass in the Evolution and Distribution of Deep-Sea Corals
Source: Frontiers journal article supplement (doi:10.3389/fmars.2022.849402), 2022-04-06
Supplement: Data_Sheet_1.zip [file Supplemental File 3.xlsx]

## Sheet: TableS1
Table S1. Specimen collection information.
ID	Museum#	Species	Location	Latitude	Longitude	Depth (m)	Collection Year	Preservation	MutS Genbank Number	28S Genbank Number
HC001	NA	Paramurciea aff. biscaya	Gulf of Mexico	28.6721	-88.4764	1371	2011	95% EtoH, -20C	KC710762	KX267399
HC005	NA	Paramurciea aff. biscaya	Gulf of Mexico	28.6798	-88.3422	1570	2011	95% EtoH, -20C	KC710835	KX267397
HC018	NA	Paramurciea aff. biscaya	Gulf of Mexico	28.6335	-88.1696	1852	2011	95% EtoH, -20C	KC710792	KX267384
LII678	NA	Paramurciea aff. biscaya	Gulf of Mexico	28.6725	-88.4766	1373	2010	95% EtoH, -20C	KC710777	KX267414
LII680	NA	Paramurciea aff. biscaya	Gulf of Mexico	28.6724	-88.4766	1373	2010	95% EtoH, -20C	KC710778	KX267415.
SH10034	NA	Paramurciea aff. biscaya	Gulf of Mexico	28.6823	-88.345	1570	2017	flash frozen liquid N2, -80C	NA	NA
SH10035	NA	Paramurciea aff. biscaya	Gulf of Mexico	28.6823	-88.345	1570	2017	flash frozen liquid N2, -80C	NA	NA
SH10037	NA	Paramurciea aff. biscaya	Gulf of Mexico	28.6823	-88.345	1570	2017	flash frozen liquid N2, -80C	NA	NA
SH10060	NA	Paramurciea aff. biscaya	Gulf of Mexico	28.6335	-87.8304	1850	2017	flash frozen liquid N2, -80C	NA	NA
SH10061	NA	Paramurciea aff. biscaya	Gulf of Mexico	28.6335	-87.8304	1853	2017	flash frozen liquid N2, -80C	NA	NA
AT043	NA	Paramuricea cf. biscaya	Gulf of Mexico	26.634	-88.17	1847	2010	95% EtoH, -20C	KC710783	KX267375
AT046	NA	Paramuricea cf. biscaya	Gulf of Mexico	28.6337	-88.1698	1847	2010	95% EtoH, -20C	KC710784	KX267376
AT047	NA	Paramuricea cf. biscaya	Gulf of Mexico	28.6338	-88.1699	1847	2010	95% EtoH, -20C	KC710785	KX267377
HC008	NA	Paramuricea cf. biscaya	Gulf of Mexico	28.6798	-88.3422	1569	2011	95% EtoH, -20C	KC710786	KX267378
HC013	NA	Paramuricea cf. biscaya	Gulf of Mexico	28.6337	-88.1697	1850	2011	95% EtoH, -20C	KC710789	KX267381
HC016	NA	Paramuricea cf. biscaya	Gulf of Mexico	28.6336	-88.1696	1850	2011	95% EtoH, -20C	KC710791	KX267383
HC017	NA	Paramuricea cf. biscaya	Gulf of Mexico	28.6335	-88.1695	1851	2011	95% EtoH, -20C	KC710836	KX267398
LII122	NA	Paramuricea cf. biscaya	Gulf of Mexico	28.3848	-87.3876	2441	2010	95% EtoH, -20C	KC710772	KX267410.
LII601	USNM1478458	Paramuricea cf. biscaya	Gulf of Mexico	28.3105	-87.3074	2400	2010	95% EtoH, -20C	KC710776	KX267413.
LII605	NA	Paramuricea cf. biscaya	Gulf of Mexico	28.3105	-87.3073	2399	2010	95% EtoH, -20C	KC710795	KC788256
LII607	NA	Paramuricea cf. biscaya	Gulf of Mexico	28.3105	-87.3073	2377	2010	95% EtoH, -20C	KC710796	KX267387.
LII608	NA	Paramuricea cf. biscaya	Gulf of Mexico	28.3105	-87.3074	2386	2010	95% EtoH, -20C	KC710797	KX267388
LII627	NA	Paramuricea cf. biscaya	Gulf of Mexico	28.3119	-87.3029	2203	2010	95% EtoH, -20C	KC710803	KX267394.
LII632	NA	Paramuricea cf. biscaya	Gulf of Mexico	28.3104	-87.3072	2372	2010	95% EtoH, -20C	KC710804	KX267395
LII686	NA	Paramuricea cf. biscaya	Gulf of Mexico	28.6722	-88.4766	1371	2010	95% EtoH, -20C	JQ241246	KX267396
SH10274	NA	Paramuricea cf. biscaya	Gulf of Mexico	26.5716	-93.4825	1678	2017	flash frozen liquid N2, -80C	NA	NA
CE233	USNM1607835	Paramuricea cf. biscaya	Whittard Canyon, ENA	48.428	-10.183	1800	2016	95% EtoH, -20C	OM687304	NA
CE46	USNM1607709	Paramuricea cf. biscaya	Whittard Canyon, ENA	48.4672	-10.4011	1959	2014	95% EtoH, -20C	OM687310	OM687325
CE56	USNM1607714	Paramuricea cf. biscaya	Whittard Canyon, ENA	48.4672	-10.4011	2135	2014	95% EtoH, -20C	OM687313	OM687327
CE58	USNM1607715	Paramuricea cf. biscaya	Whittard Canyon, ENA	48.4672	-10.4011	1951	2014	95% EtoH, -20C	OM687307	OM687329
CE62	USNM1607718	Paramuricea cf. biscaya	Whittard Canyon, ENA	48.4672	-10.4011	1957	2014	95% EtoH, -20C	OM687306	OM687332
CE83	USNM1608089	Paramuricea cf. biscaya	Whittard Canyon, ENA	48.4672	-10.4011	2075	2014	95% EtoH, -20C	OM687308	OM687330
CE159	USNM1607758	Paramuricea cf. placomus 1	Whittard Canyon, ENA	48.644	-10.476	1274	2016	95% EtoH, -20C	OM687305	NA
CE24	USNM1607688	Paramuricea cf. placomus 1	Whittard Canyon, ENA	48.7089	-10.5607	1080	2014	95% EtoH, -20C	OM687309	OM687334
CE33	USNM1607930	Paramuricea cf. placomus 1	Whittard Canyon, ENA	48.6315	-10.4937	1300	2014	95% EtoH, -20C	OM687312	OM687333
LII100	NA	Paramuricea cf. placomus 2	Gulf of Mexico	26.1806	-84.7053	539	2009	95% EtoH, -20C	KC710733	KX267452
LII341	NA	Paramuricea cf. placomus 2	Gulf of Mexico	26.2041	-84.7335	541	2010	95% EtoH, -20C	KC710735	KX267453
LII396	NA	Paramuricea cf. placomus 2	Gulf of Mexico	27.5978	-91.8253	539	2010	95% EtoH, -20C	KC710737	KX267450
PC1	NA	Paramuricea clavata	Meditteranean Sea	42.2862	3.28095	30	2012	95% EtoH, -20C	OM687323	OM687344
PC3	NA	Paramuricea clavata	Meditteranean Sea	42.3213	3.31059	30	2012	95% EtoH, -20C	OM687324	OM687343
PG1	NA	Paramuricea grayi	Meditteranean Sea	38.2678	15.2286	80	2013	95% EtoH, -20C	OM687322	OM687342
M1	NA	Paramuricea macrospina	Meditteranean Sea	39.915	3.63618	67	2010	95% EtoH, -20C	OM687320	OM687340
M2	NA	Paramuricea macrospina	Meditteranean Sea	39.8537	3.54113	76	2011	95% EtoH, -20C	OM687321	OM687341
BLT912	NA	Paramuricea cf. placomus 1	Baltimore Canyon, WNA	38.151	-73.838	382	2012	95% EtoH, RT	KF856192	NA
BUM500	NA	Paramuricea cf. placomus 1	Gulf of Maine, WNA	43.3692	-67.8119	230*	2013	95% EtoH, RT	NA	NA
CE97	USNM1607728	Paramuricea sp. 3	Whittard Canyon, ENA	48.58	-10.397	1637	2014	95% EtoH, -20C	OM687318	OM687328
CAN1272	CMNI2021-0565	Paramuricea sp. 4	Labrador Sea, WNA	51.0333	-49.75	936	2005-2011	frozen -20C, 100% EtOH RT	KX267560	KX267370
CAN1280	CMNI2021-0190	Paramuricea sp. 4	Labrador Sea, WNA	50.9833	-49.75	981	2005-2011	frozen -20C, 100% EtOH RT	KX267557	KX267367
CAN2828	CMNI2021-0566	Paramuricea sp. 4	Labrador Sea, WNA	46.315	-46.907	827	2005-2011	frozen -20C, 100% EtOH RT	KX267555	KX267365
CAN4750	CMNI2021-0173	Paramuricea sp. 4	Labrador Sea, WNA	48.392	-49.072	1028	2005-2011	frozen -20C, 100% EtOH RT	KX267538	KX267348
CAN7311	CMNI2021-0184	Paramuricea sp. 4	Labrador Sea, WNA	56.2083	-57.255	1314	2005-2011	frozen -20C, 100% EtOH RT	KX267553	KX267363
CE107	USNM1607732	Paramuricea sp. 1	Whittard Canyon, ENA	48.58	-10.397	1775	2014	95% EtoH, -20C	OM687314	OM687335
CE108	USNM1607733	Paramuricea sp. 3	Whittard Canyon, ENA	48.58	-10.397	1621	2014	95% EtoH, -20C	OM687311	OM687326
CE120	USNM1607737	Paramuricea sp. 3	Whittard Canyon, ENA	48.58	-10.397	1609	2014	95% EtoH, -20C	OM687317	OM687331
CE124	USNM1607739	Paramuricea sp. 1	Whittard Canyon, ENA	48.58	-10.397	1741	2014	95% EtoH, -20C	OM687319	OM687337
CE125	USNM1607740	Paramuricea sp. 1	Whittard Canyon, ENA	48.58	-10.397	1708	2014	95% EtoH, -20C	OM687315	OM687336
CE25	USNM1607700	Paramuricea sp. 2	Whittard Canyon, ENA	48.7089	-10.5607	1011	2014	95% EtoH, -20C	OM687316	OM687338
HC019	NA	Paramuricea sp. 3	Gulf of Mexico	27.5866	-89.7047	1047	2011	95% EtoH, -20C	KC710805	KX267418
LII591	NA	Paramuricea sp. 3	Gulf of Mexico	28.8527	-88.4919	885	2010	95% EtoH, -20C	KC710829	KX267442
LII597	NA	Paramuricea sp. 3	Gulf of Mexico	28.8559	-88.4936	889	2010	95% EtoH, -20C	KC710775	KC788255
LII599	NA	Paramuricea sp. 3	Gulf of Mexico	28.8557	-88.4936	887	2010	95% EtoH, -20C	KC710833	KX267446
LII600	NA	Paramuricea sp. 3	Gulf of Mexico	28.856	-88.4936	889	2010	95% EtoH, -20C	KC710834	KX267447
SH10339	NA	Paramuricea sp. 3	Gulf of Mexico	27.1102	-91.1665	1400	2017	flash frozen liquid N2, -80C	NA	NA
SH10341	NA	Paramuricea sp. 3	Gulf of Mexico	27.1102	-91.1665	1400	2017	flash frozen liquid N2, -80C	NA	NA
SH10351	NA	Paramuricea sp. 3	Gulf of Mexico	27.1102	-91.1665	1400	2017	flash frozen liquid N2, -80C	NA	NA
LII421	USNM1478384	Paramuricea sp. 2	Gulf of Mexico	27.685	-92.2205	342	2010	95% EtoH, -20C	KC710751	KX267458
LII568	USNM1478430	Paramuricea sp. 2	Gulf of Mexico	29.1091	-88.3874	354	2010	95% EtoH, -20C	KC710756	NA
SH10067	NA	Paramuricea sp. 2	Gulf of Mexico	28.1935	-88.2004	440	2017	flash frozen liquid N2, -80C	OM687339	NA
LII501	USNM1478406	Unid. Plexauridae	Gulf of Mexico	27.8114	-91.5375	261	2010	95% EtoH, -20C	KC710741	KC788252
WNA=Westnern North Atlantic
ENA=Eastern North Atlantic
USNM=United States National Museum (now Smithsonian Instiution National Museum of Natural History), CMN=Canadian Museum Nature
*Approximated from Google Earth Pro, Terrain

## Sheet: TableS2
Table S2. Read and locus statistics
ID	Number of Filtered Reads	Consensus Reads	Number of Loci in Assembly
M1	178324	3555	197
CE124	631044	15304	1177
SH10339	832828	15623	624
SH10341	1066983	18515	763
BUM500	1087956	32843	2008
CAN1272	1124834	30275	1910
CAN1280	1167433	33510	2011
SH10351	1239799	22178	830
HC008	1394616	22739	850
BLT912	1510700	47982	2386
CAN4750	1525136	41716	2293
CE25	1540767	45823	2264
HC005	1563985	45894	2325
LII501	1712218	50411	1359
LII600	1901474	56116	2557
LII421	1941271	64531	2532
CE125	1969837	59731	2549
CE107	1987553	58518	2527
M2	2054193	59066	2056
CE33	2100069	64467	2609
LII341	2246616	72143	2678
SH10061	2255057	42492	1584
CAN7311	2337942	67748	2710
CE58	2451847	71759	2680
CE46	2494265	72652	2734
CE83	2528568	74338	2686
SH10274	2586529	48246	1722
CE56	2622781	76011	2701
PC3	2807141	85760	2100
CE120	2817131	85064	2759
CE159	2843489	77663	2698
LII100	2846322	83335	2742
LII591	2931745	87266	2773
CE233	2936370	80852	2773
CE24	3351415	96278	2751
LII599	3368716	97637	2797
CE62	3406127	88376	2770
PC1	3511029	97543	2160
LII396	3524360	98672	2769
HC013	3626609	46373	1625
LII568	3693951	94461	2778
PG1	3709595	102010	2127
HC019	3768368	96956	2807
CE108	3781146	100324	2799
HC017	3795052	47914	1639
LII597	3859135	94520	2807
HC016	4172605	49787	1722
SH10037	4387506	67450	2086
LII686	4983220	89632	2807
CAN2828	5004100	100796	2794
CE97	5284336	110676	2794
AT047	5987023	61622	2009
LII607	6286880	69353	2095
HC001	6978389	72317	2129
LII680	7206350	74871	2137
LII122	7294572	72633	2218
LII678	7420698	75767	2189
SH10035	7690384	94362	2501
SH10060	8827308	96515	2636
HC018	8876153	80400	2351
AT046	9635917	81618	2367
LII605	11145859	93190	2541
LII601	11154260	91245	2482
LII608	11246887	91804	2459
LII632	11411555	91775	2473
SH10034	11634339	113801	2660
LII627	12117278	93542	2575
AT043	13752843	100780	2608
SH10067	16140313	125198	2750

## Sheet: TableS3
Table S3. Environmenatl conditions used in analyses
ID	Loc	Water	Temp	Depth	Depth2	Spp
HC-C019	GOM	AAIW	6	1047	Deep	sp. 3
LII-591	GOM	AAIW	6	885	Deep	sp. 3
LII-597	GOM	AAIW	6	889	Deep	sp. 3
LII-599	GOM	AAIW	6	887	Deep	sp. 3
LII-600	GOM	AAIW	6	889	Deep	sp. 3
SH10339	GOM	NADW	4.5	1400	Deep	sp. 3
SH10341	GOM	NADW	4.5	1400	Deep	sp. 3
SH10351	GOM	NADW	4.5	1400	Deep	sp. 3
CE-108	IRE	LSW	4.4	1621	Deep	sp. 3
CE-120	IRE	LSW	4.4	1609	Deep	sp. 3
CE-97	IRE	LSW	4.4	1637	Deep	sp. 3
AT18-3-043	GOM	NADW	4.5	1847	Deep	cf. biscaya
AT18-3-046	GOM	NADW	4.5	1847	Deep	cf. biscaya
AT18-3-047	GOM	NADW	4.5	1847	Deep	cf. biscaya
HC3-05-C008	GOM	NADW	4.5	1569	Deep	cf. biscaya
HC3-07-C013	GOM	NADW	4.5	1850	Deep	cf. biscaya
HC3-07-C016	GOM	NADW	4.5	1850	Deep	cf. biscaya
HC3-07-C017	GOM	NADW	4.5	1851	Deep	cf. biscaya
LII-09-122	GOM	NADW	4.5	2441	Deep	cf. biscaya
LII-10-601	GOM	NADW	4.5	2400	Deep	cf. biscaya
LII-10-605	GOM	NADW	4.5	2399	Deep	cf. biscaya
LII-10-607	GOM	NADW	4.5	2377	Deep	cf. biscaya
LII-10-608	GOM	NADW	4.5	2386	Deep	cf. biscaya
LII-10-627	GOM	NADW	4.5	2203	Deep	cf. biscaya
LII-10-632	GOM	NADW	4.5	2372	Deep	cf. biscaya
LII-686	GOM	NADW	4.5	1371	Deep	cf. biscaya
SH10274	GOM	NADW	4.5	1678	Deep	cf. biscaya
CE-233	IRE	NADW/LSW	3.5	1800	Deep	cf. biscaya
CE-46	IRE	NADW	3.5	1959	Deep	cf. biscaya
CE-56	IRE	NADW	3.5	2135	Deep	cf. biscaya
CE-58	IRE	NADW	3.5	1951	Deep	cf. biscaya
CE-62	IRE	NADW	3.5	1957	Deep	cf. biscaya
CE-83	IRE	NADW	3.5	2075	Deep	cf. biscaya
HC-C005	GOM	NADW	4.5	1570	Deep	aff. biscaya
HC3-01-C001	GOM	NADW	4.5	1371	Deep	aff. biscaya
HC3-08-C018	GOM	NADW	4.5	1852	Deep	aff. biscaya
LII-10-678	GOM	NADW	4.5	1373	Deep	aff. biscaya
LII-10-680	GOM	NADW	4.5	1373	Deep	aff. biscaya
SH10034	GOM	NADW	4.5	1570	Deep	aff. biscaya
SH10035	GOM	NADW	4.5	1570	Deep	aff. biscaya
SH10037	GOM	NADW	4.5	1570	Deep	aff. biscaya
SH10060	GOM	NADW	4.5	1850	Deep	aff. biscaya
SH10061	GOM	NADW	4.5	1853	Deep	aff. biscaya
CAN-1272	CAN	LSW	3.7	936	Deep	sp. 4
CAN-1280	CAN	LSW	3.7	981	Deep	sp. 4
CAN-2828	CAN	LSW	3.7	827	Deep	sp. 4
CAN-4750	CAN	LSW	3.7	1028	Deep	sp. 4
CAN-7311	CAN	LSW	3.7	1314	Deep	sp. 4
PC-1	MED	MW	15.5	30	Meso	clavata
PC-3	MED	MW	15.5	30	Meso	clavata
PG-1	MED	MW	14	80	Meso	grayi
M1-1	MED	MW	15	67	Meso	macrospina
M2-5	MED	MW	15	76	Meso	macrospina
LII-100	GOM	NACW	8.5	539	Deep	placomus 2
LII-341	GOM	NACW	8.5	541	Deep	placomus 2
LII-396	GOM	NACW	8.5	539	Deep	placomus 2
CE-159	IRE	MOW	10	1274	Deep	placomus 1
CE-24	IRE	MOW	10	1080	Deep	placomus 1
CE-33	IRE	MOW	10	1300	Deep	placomus 1
BLT-912-1	NWA	NACW	8	382	Deep	placomus 1
BUM-500-3	NWA	NACW/WSW	9	230	Deep	placomus 1
LII-501	GOM	NACW	12	261	Deep	Unid. Plexauridae
LII-421	GOM	NACW	12	342	Deep	sp. 2
LII-568	GOM	NACW	12	354	Deep	sp. 2
SH10067	GOM	NACW	8.5	440	Deep	sp. 2
CE-107	IRE	LSW	4.4	1708	Deep	sp. 1
CE-124	IRE	LSW	4.4	1741	Deep	sp. 1
CE-125	IRE	LSW	4.4	1775	Deep	sp. 1
CE-25	IRE	MOW	10	1011	Deep	sp. 2
